# Supplementary material for: Prevalence and risk factors of hypothyroidism after universal salt iodisation: a large cross-sectional study from 31 provinces of China
Source: HighWire-hosted journal article supplement (doi:10.1136/bmjopen-2022-064613), 2023-02-01

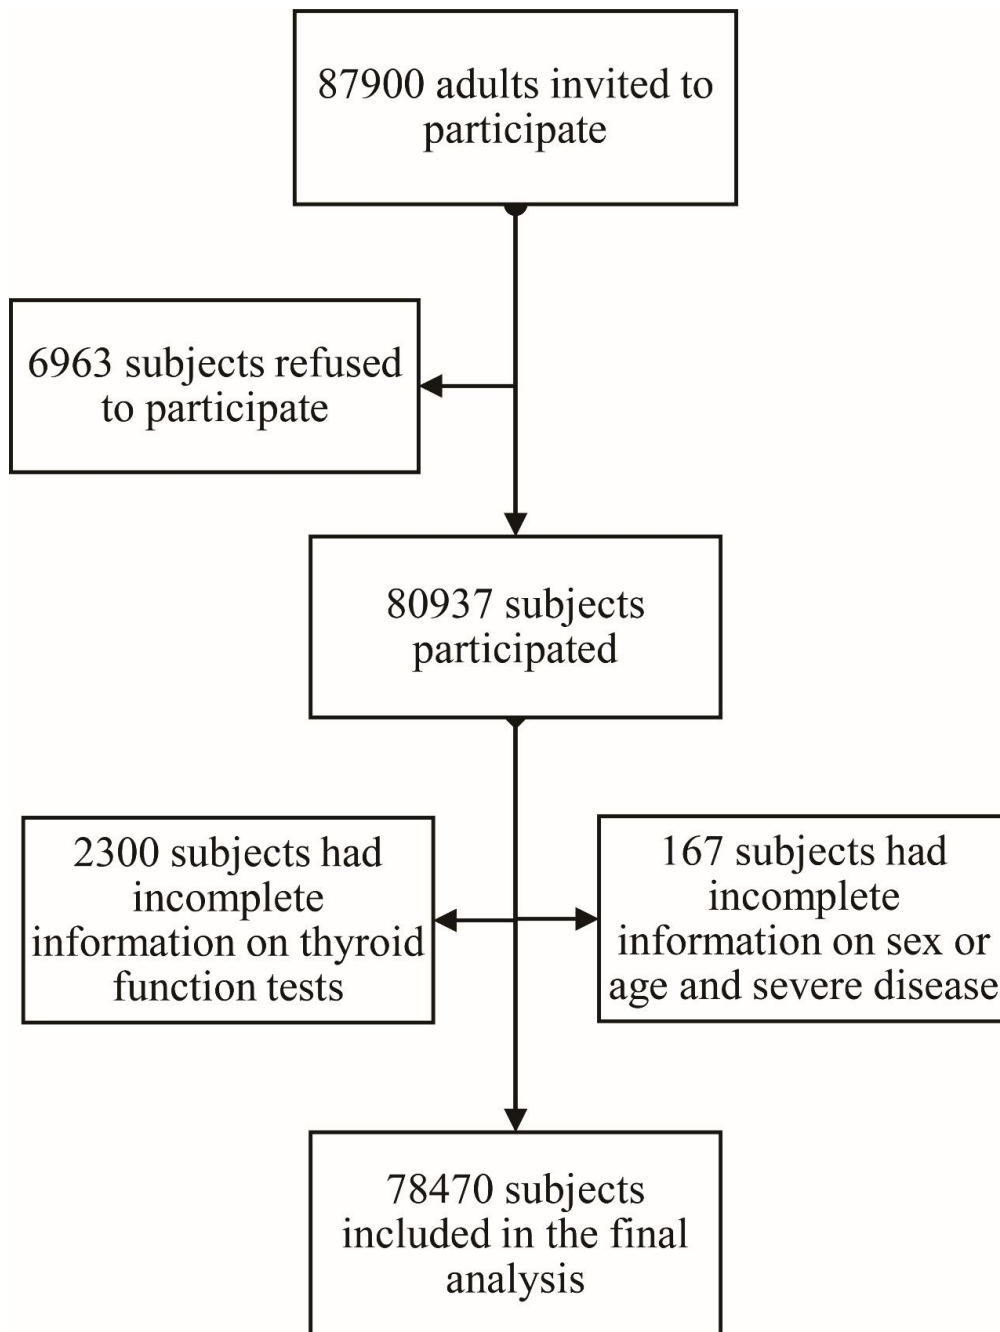

Supplement: bmjopen-2022-064613supp001_data_supplement.pdf [file bmjopen-2022-064613supp001_data_supplement.pdf]
